# Supplementary material for: Hyaluronic acid anchored paclitaxel nanocrystals improves chemotherapeutic efficacy and inhibits lung metastasis in tumor-bearing rat model
Source: Royal Society of Chemistry journal article supplement (doi:10.1039/c6ra11260a), 2016-01-01
Supplement: c6ra11260a1.pdf [file c6ra11260a1.pdf]

SUPPLEMENTARY FILE

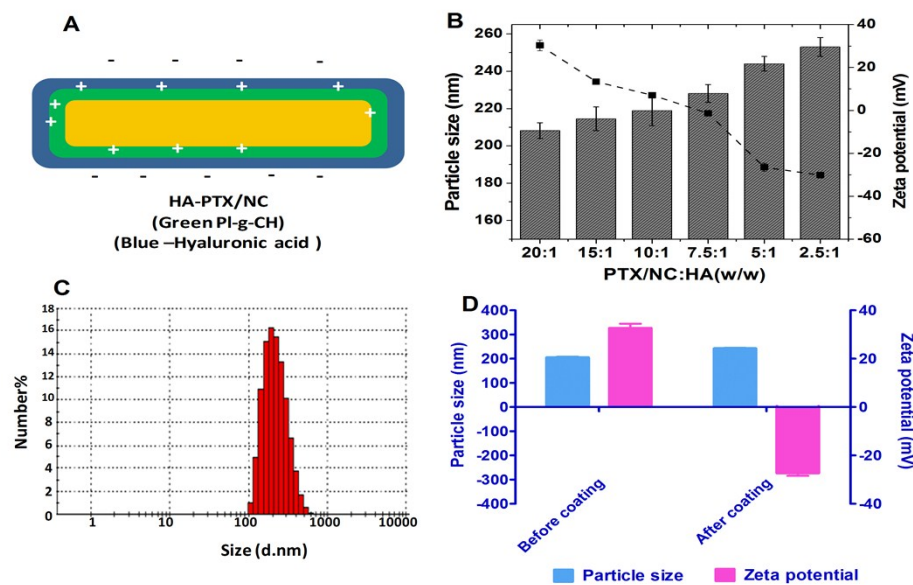

Figure S1: (A) Schematic representation of HA-PTX/NC; (B) Effect of PTX/NC:HA w/w ratio on particle size and zeta potential ; (C) Number distribution of particle size of optimized batch of HA-PTX/NC, 5:1 w/w; (D) Final particle size and zeta potential before and after coating of HA.

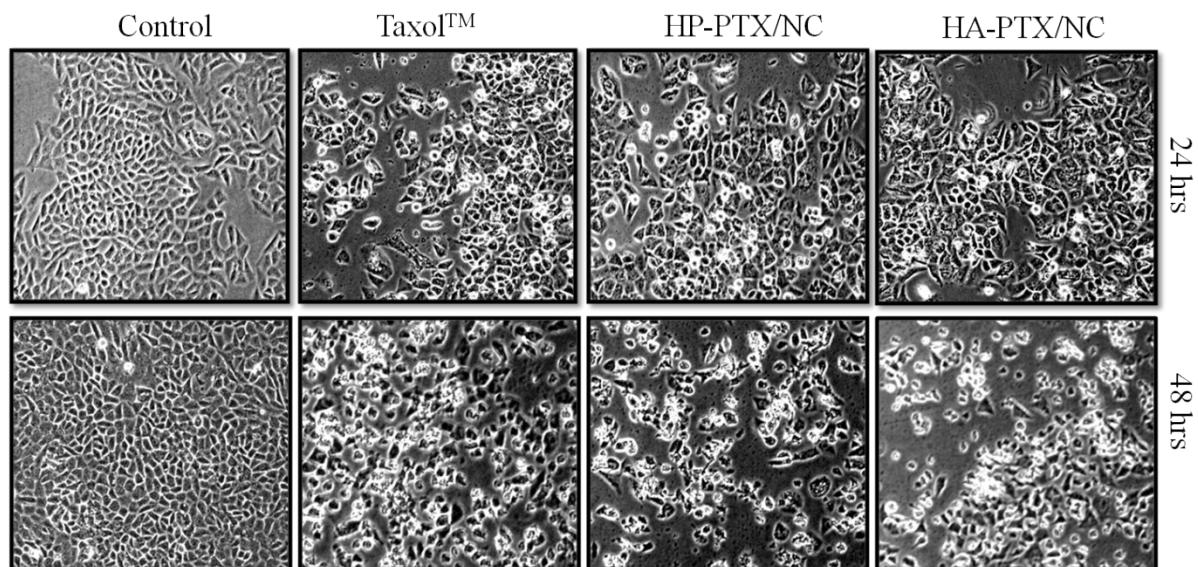

Figure S2: Optical microscopic images of MDA-MB231 after incubation with different formulations for 24hr and 48 hr at PTX equivalent 0.5 $\mu$ M.

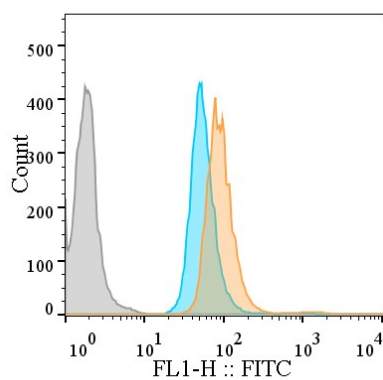

Figure S3: Uptake of FITC tagged HP-PTX/NC and HA-PTX/NC by MCF-7 cells after 6 hours of incubation determined using flow cytometer (Orange-HA-PTX/NC, Blue-HP-PTX/NC).
